# Supplementary material for: Toward the development of versatile functionalized carbon nanotubes
Source: Royal Society of Chemistry journal article supplement (doi:10.1039/c4ra17292b), 2015-01-01
Supplement: c4ra17292b1.pdf [file c4ra17292b1.pdf]

## **Toward the Development of a Versatile Functionalized Carbon Nanotubes**

Qing Wan<sup>a</sup>, Meiyong Liu<sup>a</sup>, Jianwen Tian<sup>a</sup>, Fengjie Deng<sup>a</sup>, Yanfeng Dai<sup>a</sup>, Zhen Li<sup>b</sup>, Ke Wang<sup>b</sup>,  
Qingsong Zhang<sup>b</sup>, Xiaoyong Zhang<sup>a,\*</sup> and Yen Wei<sup>b,\*</sup>

<sup>a</sup> Department of Chemistry, Nanchang University, 999 Xuefu Avenue, Nanchang 330031, China. <sup>b</sup>

Department of Chemistry and the Tsinghua Center for Frontier Polymer Research, Tsinghua  
University, Beijing, 100084, P. R. China.

## Results

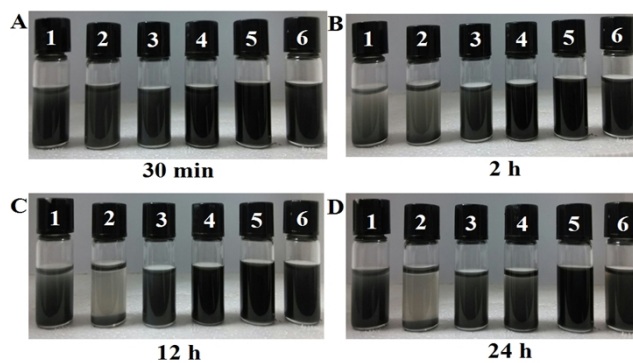

**Fig. S1** The pictures of CNT-PDA-PSMA dispersed in different organic solution at room temperature for different time. (1) acetone, (2) DMSO, (3) dichloromethane, (4) toluene, (5) DMF, (6) THF.

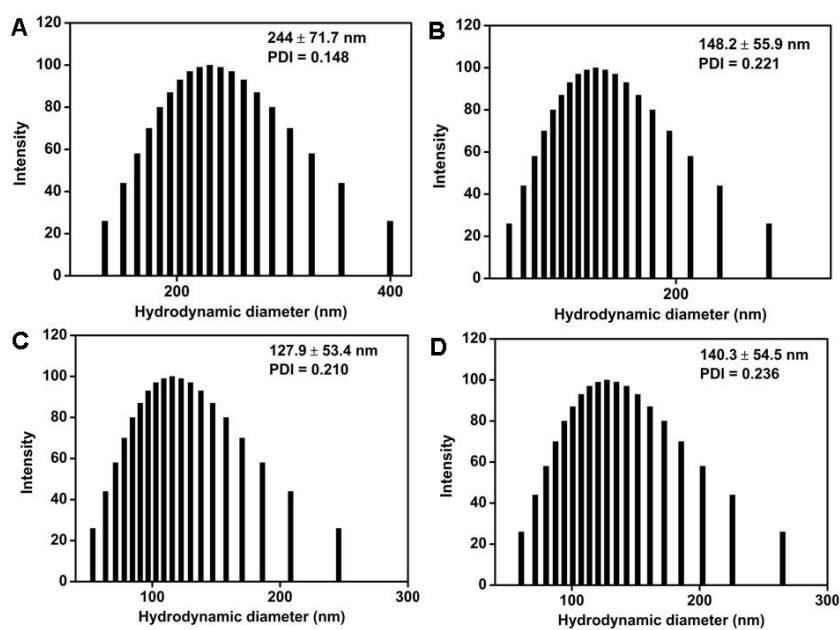

**Fig. S2** Hydrodynamic size distribution of CNT-PDA-PSPSH in water as a function of time. (A) 5 min, (B) 2 h, (C) 12 h, (D) 24 h.
